# Supplementary material for: Processing of Noni Liquor based on response surface methodology
Source: PeerJ. 2022 Aug 16;10:e13817. doi: 10.7717/peerj.13817 (PMC9390344; doi:10.7717/peerj.13817)
Supplement: Data S1 [file peerj-10-13817-s001.xlsx]

## Sheet: Liquor soaking time experiment
2017-09-18
extraction duration
50％ ethyl alcohol, 60/1(mL/g),in the dark			5.2		5.16		5.30		6.13		6.30		9.18
			20 weeks		18 weeks		16 weeks		14 weeks		12 weeks		that day
			1	2	1	2	1	2	1	2	1	2	1	2
		weight(g)	0.5006	0.5006	0.5006	0.5008	0.5007	0.5004	0.5006	0.5008	0.5005	0.5003	0.5008	0.5008
		average weight(g)	0.5006		0.5007		0.50055		0.5007		0.5004		0.5008
OD	Polyphenols(762nm)	0.5mL	0.925	0.87	0.856	0.876	0.881	0.866	0.873	0.938	0.813	0.784	0.704	0.711
		0.5mL	0.897	0.886	0.884	0.876	0.901	0.884	0.884	0.935	0.828	0.809	0.734	0.709
		average	0.911	0.878	0.87	0.876	0.891	0.875	0.8785	0.9365	0.8205	0.7965	0.719	0.71
			0.8945		0.873		0.883		0.9075		0.8085		0.7145
		extraction efficiency	0.0745469	0.0715505	0.0708241	0.0713404	0.0727164	0.0713066	0.0715959	0.0768316	0.0663427	0.0641888	0.0570905	0.0562736
			0.0730487		0.0710823		0.0720117		0.0742143		0.065266		0.056682
	Flavonoids(508nm)	5.0mL	0.448	0.449	0.436	0.438	0.433	0.412	0.478	0.558	0.395	0.39	0.192	0.188
		5.0mL	0.446	0.461	0.432	0.444	0.429	0.414	0.489	0.539	0.388	0.387	0.193	0.191
		average	0.447	0.455	0.434	0.441	0.431	0.413	0.4835	0.5485	0.3915	0.3885	0.1925	0.1895
			0.451		0.4375		0.422		0.516		0.39		0.191
		extraction efficiency	0.0187141	0.0191039	0.0180807	0.0184144	0.017931	0.0170644	0.0204925	0.02365	0.0160133	0.0158734	0.00631185	0.00616574
			0.018909		0.0182476		0.0174978		0.0220715		0.0159433		0.0062388
	Polysaccharides(489nm)	0.1mL	0.907	0.905	0.841	0.766	0.972	0.928	0.926	0.884	1.124	0.961	0.784	0.713
		0.1mL	0.92	0.933	0.895	0.928	0.974	0.937	0.926	0.848	1.136	0.98	0.776	0.856
		average	0.9135	0.919	0.868	0.847	0.973	0.9325	0.926	0.866	1.13	0.9705	0.78	0.7845
			0.91625		0.888		0.95275		0.896		1.05025		0.78
		extraction efficiency	0.148522	0.149437	0.140948	0.137397	0.158395	0.151745	0.150603	0.140558	0.184599	0.158105	0.126248	0.126997
			0.14898		0.144248		0.155071		0.14558		0.171355		0.126248
	Note: The red table above does not calculate the average value
2022-10-15
extraction duration
50％ ethyl alcohol, 60/1(mL/g),in the dark
			5.9		6.6		6.13		6.21		10.15
			1	2	1	2	1	2	1	2	1	2
		weight(g)	0.5004	0.5006	0.5005	0.5007	0.5006	0.5003	0.5006	0.5005	0.5007	0.5003
		average weight(g)	0.5005		0.5006		0.50045		0.50055		0.5005
OD	Polyphenols(762nm)	0.5mL	0.870	0.867	0.994	0.912	0.906	0.854	0.889	0.891	0.645	0.681
		0.5mL	0.846	0.855	0.970	0.928	0.916	0.887	0.886	0.895	0.661	0.678
		average	0.858	0.861	0.982	0.92	0.911	0.8705	0.8875	0.893	0.653	0.6795
			0.8595		0.951		0.89075		0.89025		0.66625
		extraction efficiency	0.0697624	0.0700069	0.0810099	0.0753491	0.0745469	0.070912	0.0724131	0.0729271	0.0511103	0.0535588
			0.0698847		0.0781789		0.07273		0.0726701		0.052334
	Flavonoids(508nm)	5.0mL	0.429	0.432	0.616	0.493	0.457	0.474	0.529	0.583	0.213	0.225
		5.0mL	0.433	0.44	0.614	0.492	0.46	0.473	0.54	0.589	0.22	0.226
		average	0.431	0.436	0.615	0.4925	0.4585	0.4735	0.5345	0.586	0.2165	0.2255
			0.4335		0.55375		0.466		0.56025		0.221
		extraction efficiency	0.0179417	0.0181782	0.0269048	0.0209268	0.0192744	0.0200173	0.0229773	0.0254916	0.00748221	0.00792695
			0.01806		0.0239152		0.0196457		0.0242343		0.00770449
	Polysaccharides(489nm)	0.1mL	1.082	1.005	0.954	0.945	1.041	1.101	1.005	0.962	1.202	1.252
		0.1mL	1.084	1.077	0.991	0.959	1.053	1.087	1.037	0.954	1.228	1.219
		average	1.083	1.077	0.9725	0.952	1.047	1.094	1.021	0.958	1.215	1.2355
			1.08		0.96225		1.0705		0.9895		1.22525
		extraction efficiency	0.176809	0.175739	0.158375	0.1549	0.170745	0.178676	0.166417	0.155961	0.198672	0.202245
			0.176274		0.156637		0.174709		0.161189		0.200458
	Note: The red table above does not calculate the average value
2018-01-10
extraction duration
50％ ethyl alcohol, 60/1(mL/g),in the dark
			10.15		11.1		11.14		11.29		12.14		12.28		1.10
			12 weeks		10 weeks		8 weeks		6 weeks		4 weeks		2 weeks		that day
		weight(g)	0.5006	0.5008	0.5003	0.5007	0.5002	0.5005	0.5008	0.5007	0.500447	0.5007	0.5004	0.5005	0.5004	0.5003
		average weight(g)	0.5007		0.5005		0.50035		0.50075		0.500573		0.50045		0.50035
OD	Polyphenols(762nm)	0.5mL	0.789	0.842	0.816	0.879	0.784	0.799	0.830	0.781	0.9	0.915	0.93	0.906	0.844	0.819
		0.5mL	0.795	0.834	0.851	0.843	0.806	0.779	0.824	0.866	0.815	0.814	0.936	0.922	0.873	0.837
		average	0.792	0.838	0.8335	0.861	0.795	0.789	0.827	0.8235	0.8575	0.8645	0.933	0.914	0.8585	0.828
			0.815		0.84725		0.792		0.82525		0.861		0.9235		0.84325
		extraction efficiency	0.0637417	0.0678914	0.0675504	0.0699929	0.0640653	0.063482	0.066893	0.0665886	0.0697105	0.0703107	0.0765751	0.0748343	0.0698078	0.0670507
			0.0658169		0.0687721		0.0637735		0.0667408		0.0700106		0.0757046		0.0684294
	Flavonoids(508nm)	5.0mL	0.347	0.368	0.318	0.370	0.349	0.354	0.317	0.36	0.317	0.317	0.282	0.286	0.188	0.194
		5.0mL	0.372	0.386	0.355	0.346	0.347	0.355	0.336	0.399	0.322	0.32	0.294	0.304	0.182	0.191
		average	0.3595	0.377	0.3365	0.358	0.348	0.3545	0.3265	0.3795	0.3195	0.3185	0.288	0.295	0.185	0.1925
			0.36825		0.34725		0.35125		0.353		0.319		0.2915		0.18875
		extraction efficiency	0.014451	0.0152975	0.0133383	0.014375	0.0139018	0.0142102	0.012838	0.0154223	0.0125059	0.0124509	0.0109717	0.0113106	0.00595134	0.00631816
			0.0148743		0.0138569		0.014056		0.01413		0.0124784		0.0111412		0.00613473
	Polysaccharides(489nm)	0.1mL	1.163	1.156	1.054	1.128	1.122	1.110	1.074	1.126	1.128	1.072	0.962	0.926	0.874	0.837
		0.1mL	1.237	1.203	1.145	1.132	1.103	1.180	1.000	1.136	1.182	1.125	0.998	0.896	0.917	0.924
		average	1.2	1.1795	1.0995	1.13	1.1125	1.145	1.037	1.131	1.155	1.0985	0.98	0.911	0.8955	0.8805
			1.18975		1.11475		1.12875		1.084		1.12675		0.9455		0.888
		extraction efficiency	0.196215	0.192725	0.179592	0.184525	0.181794	0.187096	0.169013	0.184691	0.188781	0.179282	0.159656	0.148135	0.145584	0.143114
			0.194469		0.18206		0.184446		0.176851		0.184031		0.153895		0.144349
2018-01-10
extraction duration
			10.24		11.6		11.22		12.8		12.19		1.4		1.10
			11 weeks		9 weeks		7 weeks		5 weeks		3 weeks		1 weeks		that day
		weight(g)	0.5007	0.5004	0.5005	0.5006	0.5004	0.5006	0.5009	0.5007	0.5002	0.5005	0.5006	0.5001	0.5004	0.5003
		average weight(g)	0.50055		0.50055		0.5005		0.5008		0.50035		0.50035		0.50035
OD	Polyphenols(762nm)	0.5mL	0.755	0.841	0.737	0.795	0.839	0.890	0.903	0.815	0.826	0.924	0.912	1.033	0.844	0.819
		0.5mL	0.785	0.838	0.851	0.897	0.838	0.861	0.923	0.884	0.832	0.872	0.995	0.947	0.873	0.837
		average	0.77	0.8395	0.794	0.846	0.8385	0.8755	0.913	0.8495	0.829	0.898	0.9535	0.99	0.8585	0.828
			0.80475		0.82		0.857		0.88125		0.8635		0.97175		0.84325
		extraction efficiency	0.0617318	0.0680819	0.0639361	0.0686449	0.0679911	0.0713235	0.0746838	0.0689489	0.067155	0.0733812	0.0784059	0.0818018	0.0698078	0.0670507
			0.0649059		0.0662907		0.0696576		0.0718169		0.070269		0.080103		0.0684294
	Flavonoids(508nm)	5.0mL	0.367	0.370	0.361	0.356	0.340	0.342	0.324	0.33	0.322	0.317	0.285	0.288	0.188	0.194
		5.0mL	0.345	0.353	0.358	0.328	0.338	0.344	0.327	0.33	0.326	0.32	0.295	0.29	0.182	0.191
		average	0.356	0.3615	0.3595	0.342	0.339	0.343	0.3255	0.33	0.324	0.3185	0.29	0.289	0.185	0.1925
			0.35875		0.35075		0.341		0.32775		0.32125		0.2895		0.18875
		extraction efficiency	0.0142776	0.0145542	0.0144538	0.0135983	0.0134575	0.013647	0.0127867	0.0130111	0.0127315	0.0124558	0.0110648	0.0110271	0.00595134	0.00631816
			0.0144158		0.014026		0.0135523		0.0128989		0.0125936		0.0110459		0.00613473
	Polysaccharides(489nm)	0.1mL	1.169	1.154	1.171	1.077	0.983	1.109	1.148	1.068	0.972	0.959	0.792	0.886	0.874	0.837
		0.1mL	1.168	1.194	1.186	1.140	1.140	1.110	1.136	1.033	0.854	0.939	0.927	0.938	0.917	0.924
		average	1.1685	1.174	1.1785	1.1085	1.0615	1.1095	1.142	1.0505	0.913	0.949	0.8595	0.912	0.8955	0.8805
			1.17125		1.1435		1.0855		1.09625		0.931		0.88575		0.888
		extraction efficiency	0.190933	0.191963	0.192674	0.180983	0.173228	0.181149	0.186448	0.171294	0.148557	0.154462	0.139533	0.14842	0.145584	0.143114
			0.191448		0.186828		0.177189		0.178872		0.151511		0.143974		0.144349

## Sheet: Polysaccharides
Glucose standard curve
	Glucose content mg/mL	OD	OD	Average value
	20	0.253	0.257	0.255
	40	0.496	0.503	0.4995
	60	0.735	0.722	0.7285
	80	0.987	1.022	1.0045
	100	1.211	1.195	1.203
	Polysaccharides(489nm)
	extraction temperature	weight(g)	average weight(g)	0.1ml	0.1ml	average		extraction efficiency	extraction efficiency	SD	Conditions: 0.500g sample, 50% ethanol, liquid-solid ratio of 60mL/g, temperature, water bath for 30min, ultrasound for 12min, centrifugation at 6000r/min for 10min
	30℃	0.5005	0.5006	0.852	0.867	0.8595	0.861	0.139782	0.13956	0.000110911	0.000110889
		0.5007		0.865	0.86	0.8625			0.140004	0.000110867
	40℃	0.5004	0.50045	0.879	0.895	0.887	0.8955	0.145569	0.144168	0.000700494	0.000700425
		0.5005		0.905	0.903	0.904			0.14697	0.000700355
	50℃	0.5007	0.5006	0.967	0.96	0.9635	0.95925	0.156138	0.156814	0.00033808	0.000338147
		0.5005		0.946	0.964	0.955			0.155461	0.000338215
	60℃	0.5006	0.5007	0.84	0.853	0.8465	0.8505	0.138007	0.137368	0.00031915	0.000319086
		0.5008		0.861	0.848	0.8545			0.138645	0.000319022
	70℃	0.5003	0.5005	0.961	0.952	0.9565	0.9515	0.154878	0.155773	0.000447374	0.000447195
		0.5007		0.951	0.942	0.9465			0.153984	0.000447017
	Polysaccharides(489nm)
	extraction time	weight(g)	average weight(g)	0.1ml	0.1ml	average		extraction efficiency	extraction efficiency	SD	Conditions: 0.500g sample, 50% ethanol, liquid-solid ratio of 60mL /g,50℃ water bath, water bath time as shown in the table, ultrasonic 12min, 6000r/min centrifugation for 10min
	0.5h	0.5006	0.5005	0.879	0.884	0.8815	0.8835	0.143556	0.143195	0.000180805	0.000180841
		0.5004		0.874	0.897	0.8855			0.143918	0.000180878
	1.0h	0.5005	0.50055	0.864	0.855	0.8595	0.86125	0.139838	0.13956	0.000138703	0.000138689
		0.5006		0.87	0.856	0.863			0.140115	0.000138675
	1.5h	0.5006	0.50065	0.892	0.897	0.8945	0.89675	0.145719	0.145359	0.000179998	0.00017998
		0.5007		0.901	0.897	0.899			0.146079	0.000179962
	2.0h	0.5005	0.5006	0.893	0.916	0.9045	0.90175	0.146566	0.147053	0.00024358	0.000243531
		0.5007		0.886	0.912	0.899			0.146079	0.000243482
	2.5h	0.5006	0.50065	0.956	0.946	0.951	0.93725	0.15246	0.154764	0.00115207	0.00115196
		0.5007		0.926	0.921	0.9235			0.150156	0.00115184
	3.0h	0.5005	0.50065	0.952	0.942	0.947	0.94675	0.154041	0.154129	4.38956e-05
		0.5008		0.963	0.93	0.9465			0.153954	4.38694e-05
	Polysaccharides(489nm)
	Liquid-solid ratio (mL/g)	weight(g)	average weight(g)	0.1ml	0.1ml	average		extraction efficiency	extraction efficiency	SD	Conditions: 0.500g sample, 50% ethanol, liquid-solid ratio as shown in the table,50℃ water bath for 30min, ultrasound for 12min, centrifugation at 6000r/min for 10min
	10/1	0.5008	0.50075	0.708	0.733	0.7205	0.75075	0.121393	0.116347	0.00252287	0.00252312
		0.5007		0.739	0.823	0.781			0.12644	0.00252337
	20/1	0.5006	0.5006	0.837	0.827	0.832	0.843	0.136786	0.134955	0.000915568	0.000915568
		0.5006		0.82	0.888	0.854			0.138617	0.000915568
	30/1	0.5006	0.5005	0.901	0.845	0.873	0.9315	0.151548	0.14178	0.00488429	0.00488527
		0.5004		0.983	0.997	0.99			0.161321	0.00488625
	40/1	0.5007	0.50075	0.934	0.913	0.9235	0.9205	0.149642	0.150156	0.000257122	0.000257096
		0.5008		0.988	0.847	0.9175			0.149128	0.000257071
	50/1	0.5006	0.50065	0.905	0.848	0.8765	0.9105	0.148008	0.142362	0.00282255	0.00282226
		0.5007		0.93	0.959	0.9445			0.153652	0.00282198
	60/1	0.5008	0.5007	0.911	0.861	0.886	0.891	0.144747	0.143886	0.000430453	0.000430539
		0.5006		0.898	0.894	0.896			0.145609	0.000430625
	70/1	0.5008	0.5008	0.787	0.877	0.832	0.891	0.144718	0.134901	0.00490881	0.00490881
		0.5008		0.951	0.949	0.95			0.154536	0.00490881
	80/1	0.5007	0.5004	0.923	0.886	0.9045	0.8925	0.145084	0.146994	0.000955138	0.000955711
		0.5001		0.863	0.898	0.8805			0.143171	0.000956284
	90/1	0.5007	0.50075	0.873	0.843	0.858	0.79325	0.128466	0.139255	0.0053947	0.00539417
		0.5008		0.691	0.766	0.7285			0.117678	0.00539363
	Polysaccharides(489nm)
	ethanol concentration	weight(g)	average weight(g)	0.1ml	0.1ml	average		extraction efficiency	extraction efficiency	SD	Conditions: 0.500g sample, solvent concentration as shown in the table, liquid-solid ratio of 60mL /g,50℃ water bath for 30min, ultrasound for 12min, centrifugation at 6000r/min for 10min
	0.25	0.5004	0.5004	0.976	1.017	0.9965	0.99525	0.162195	0.162403	0.000104083	0.000104083
		0.5004		0.979	1.009	0.994			0.161987	0.000104083
	0.5	0.5008	0.50065	0.902	0.979	0.9405	0.947	0.154083	0.152955	0.000563877	0.000564046
		0.5005		0.981	0.926	0.9535			0.155211	0.000564215
	0.6	0.5004	0.5004	0.88	0.982	0.931	0.91575	0.148956	0.151495	0.00126982	0.00126982
		0.5004		0.913	0.888	0.9005			0.146416	0.00126982
	0.75	0.5006	0.50055	0.802	0.853	0.8275	0.8545	0.138714	0.134206	0.00225423	0.00225446
		0.5005		0.896	0.867	0.8815			0.143223	0.00225468
	1	0.5002	0.50025	0.464	0.479	0.4715	0.487	0.0775779	0.0750033	0.00128727	0.00128714
		0.5003		0.515	0.49	0.5025			0.0801519	0.00128702
Polysaccharides response surface
	Polysaccharides(489nm)								Conditions: 0.500g sample, 25% ethanol, liquid-solid ratio, temperature, water bath time, ultrasonic 12min, 6000r/min centrifugation 10min
	test number	weight(g)	average weight(g)	0.1ml	0.1ml	average		extraction efficiency
	1	0.5006	0.5007	0.986	1.008	0.997	0.99175	0.161516
		0.5008		0.994	0.979	0.9865
	2	0.5006	0.50065	0.990	1.010	1	0.9975	0.162489
		0.5007		0.993	0.997	0.995
	3	0.5005	0.5006	0.936	0.952	0.944	0.9365	0.152351
		0.5007		0.927	0.931	0.929
	4	0.5008	0.5007	0.967	0.965	0.966	0.96225	0.156606
		0.5006		0.954	0.963	0.9585
	5	0.5007	0.5005	0.893	0.897	0.895	0.8895	0.144555
		0.5003		0.885	0.883	0.884
	6	0.5004	0.50045	0.909	0.91	0.9095	0.90225	0.146693
		0.5005		0.895	0.895	0.895
	7	0.5007	0.50065	0.917	0.918	0.9175	0.90075	0.146385
		0.5006		0.886	0.882	0.884
	8	0.5006	0.50065	0.901	0.899	0.9	0.89875	0.146052
		0.5007		0.886	0.909	0.8975
	9	0.5004	0.50055	0.913	0.928	0.9205	0.91075	0.148079
		0.5007		0.896	0.906	0.901
	10	0.5003	0.5005	0.901	0.889	0.895	0.90275	0.146762
		0.5007		0.9	0.921	0.9105
	11	0.5008	0.5007	0.944	0.966	0.955	0.9585	0.155982
		0.5006		0.971	0.953	0.962
	12	0.5008	0.50075	0.903	0.892	0.8975	0.89625	0.145607
		0.5007		0.896	0.894	0.895
	13	0.5004	0.50045	0.95	0.956	0.953	0.93825	0.152688
		0.5005		0.924	0.923	0.9235
	14	0.5005	0.50065	0.933	0.902	0.9175	0.91275	0.148382
		0.5008		0.903	0.913	0.908
	15	0.5008	0.50075	0.907	0.895	0.901	0.888	0.144234
		0.5007		0.872	0.878	0.875
	The optimal conditions of polysaccharides response surface optimization were as follows:
	Liquid-solid ratio (mL/g)	50mL/g
	extraction temperature	60℃
	time	3.5h
	ethanol concentration	0.25
	extraction efficiency	0.1635

## Sheet: Polyphenols
Standard curve of tea polyphenols
	Tea polyphenol content mg/mL	OD	OD	Average value
	40	0.256	0.255	0.2555
	80	0.444	0.439	0.4415
	120	0.626	0.604	0.615
	160	0.788	0.782	0.785
	200	0.958	0.942	0.95
	Polyphenols(762nm)
	extraction temperature	weight(g)	average weight(g)	0.5ml	0.5ml	average		extraction efficiency	extraction efficiency	SD	Conditions: 0.500g sample, 50% ethanol, liquid-solid ratio of 60mL/g, temperature, water bath for 30min, ultrasound for 12min, centrifugation at 6000r/min for 10min
	30℃	0.5004	0.50035	0.742	0.755	0.7485	0.762	0.0610482	0.0598158	0.000616196	0.000616257
		0.5003		0.774	0.777	0.7755			0.0622808	0.000616319
	40℃	0.5004	0.50025	0.814	0.832	0.823	0.8475	0.0688292	0.0665831	0.00112306	0.0011234
		0.5001		0.857	0.887	0.872			0.0710767	0.00112374
	50℃	0.5002	0.50035	0.867	0.905	0.886	0.88575	0.0722903	0.0723347	2.21983e-05	2.21917e-05
		0.5005		0.879	0.892	0.8855			0.0722459	2.2185e-05
	60℃	0.5005	0.5006	0.867	0.899	0.883	0.9165	0.0750463	0.0720189	0.00151371	0.00151341
		0.5007		0.957	0.943	0.95			0.0780725	0.0015131
	70℃	0.5006	0.5006	0.963	0.983	0.973	0.98375	0.0811526	0.0801765	0.000488051	0.00048395
		0.5007		0.980	1.009	0.9945			0.0821123	0.000479849
	Polyphenols(762nm)
	extraction time	weight(g)	average weight(g)	0.5ml	0.5ml	average		extraction efficiency	extraction efficiency	SD	Conditions: 0.500g sample, 50% ethanol, liquid-solid ratio of 60mL /g,50℃ water bath, water bath time as shown in the table, ultrasonic 12min, 6000r/min centrifugation for 10min
	0.5h	0.5006	0.5005	0.835	0.841	0.838	0.83225	0.0674099	0.0679185	0.000254317	0.000254368
		0.5004		0.819	0.834	0.8265			0.066901	0.000254419
	1.0h	0.5005	0.50055	0.84	0.863	0.8515	0.87275	0.0710809	0.0691581	0.000961394	0.000961298
		0.5006		0.891	0.897	0.894			0.0730033	0.000961202
	1.5h	0.5006	0.50065	0.841	0.869	0.855	0.8685	0.0706808	0.0694621	0.000609371	0.00060931
		0.5007		0.871	0.893	0.882			0.0718993	0.000609249
	2.0h	0.5005	0.5006	0.902	0.95	0.926	0.914	0.0748193	0.0759241	0.000552384	0.000552274
		0.5007		0.919	0.885	0.902			0.073715	0.000552163
	2.5h	0.5006	0.50065	0.873	0.904	0.8885	0.88775	0.0724286	0.0725039	3.76671e-05	3.76634e-05
		0.5007		0.88	0.894	0.887			0.0723533	3.76596e-05
	3.0h	0.5005	0.50065	0.854	0.873	0.8635	0.879	0.0716341	0.0702479	0.000693107	0.0006929
		0.5008		0.885	0.904	0.8945			0.0730195	0.000692692
	Polyphenols(762nm)
	Liquid-solid ratio (mL/g)	weight(g)	average weight(g)	0.5ml	0.5ml	average		extraction efficiency	extraction efficiency	SD	Conditions: 0.500g sample, 50% ethanol, liquid-solid ratio as shown in the table,50℃ water bath for 30min, ultrasound for 12min, centrifugation at 6000r/min for 10min
	10/1	0.5008	0.50075	0.686	0.71	0.698	0.686	0.0541007	0.0551844	0.000541883	0.000541937
		0.5007		0.671	0.677	0.674			0.0530167	0.000541991
	20/1	0.5006	0.5006	0.752	0.783	0.7675	0.77925	0.062584	0.0615171	0.000533451	0.000533451
		0.5006		0.777	0.805	0.791			0.0636509	0.000533451
	30/1	0.5006	0.5005	0.837	0.829	0.833	0.825	0.0667514	0.0674645	0.000356533	0.000356605
		0.5004		0.818	0.816	0.817			0.0660381	0.000356676
	40/1	0.5007	0.50075	0.837	0.845	0.841	0.8405	0.0681251	0.0681773	2.6097e-05	2.60944e-05
		0.5008		0.819	0.861	0.84			0.0680729	2.60918e-05
	50/1	0.5006	0.50065	0.844	0.844	0.844	0.8455	0.0685926	0.0684633	6.46746e-05	6.46681e-05
		0.5007		0.845	0.849	0.847			0.068722	6.46617e-05
	60/1	0.5008	0.5007	0.814	0.816	0.815	0.8085	0.0652269	0.0658038	0.00028847	0.000288528
		0.5006		0.805	0.799	0.802			0.0646497	0.000288586
	70/1	0.5008	0.5008	0.821	0.836	0.8285	0.82825	0.0670064	0.0670291	1.13455e-05	1.13455e-05
		0.5008		0.832	0.824	0.828			0.0669837	1.13455e-05
	80/1	0.5007	0.5004	0.853	0.843	0.848	0.84725	0.0687859	0.0688128	1.34363e-05	1.34444e-05
		0.5001		0.822	0.871	0.8465			0.068759	1.34525e-05
	90/1	0.5007	0.50075	0.853	0.838	0.8455	0.771	0.0618164	0.0685858	0.00338472	0.00338438
		0.5008		0.671	0.722	0.6965			0.0550483	0.00338404
	Polyphenols(762nm)
	ethanol concentration	weight(g)	average weight(g)	0.5ml	0.5ml	average		extraction efficiency	extraction efficiency	SD	Conditions: 0.500g sample, solvent concentration as shown in the table, liquid-solid ratio of 60mL /g,50℃ water bath for 30min, ultrasound for 12min, centrifugation at 6000r/min for 10min
	0.25	0.5004	0.5004	0.890	0.86	0.875	0.89325	0.0729644	0.0713066	0.000828882	0.000828882
		0.5004		0.895	0.928	0.9115			0.0746221	0.000828882
	0.5	0.5008	0.50065	0.944	0.95	0.947	0.939	0.0770816	0.0777846	0.000351512	0.000351617
		0.5005		0.942	0.92	0.931			0.0763782	0.000351722
	0.6	0.5004	0.5004	0.834	0.873	0.8535	0.87375	0.071193	0.0693536	0.000919719	0.000919719
		0.5004		0.888	0.9	0.894			0.0730325	0.000919719
	0.75	0.5006	0.50045	0.732	0.777	0.7545	0.79025	0.0636018	0.0603367	0.00163258	0.00163307
		0.5003		0.803	0.849	0.826			0.066869	0.00163356
	1	0.5002	0.50035	0.374	0.415	0.3945	0.39275	0.0275035	0.0276707	8.36375e-05	8.36125e-05
		0.5005		0.382	0.4	0.391			0.0273363	8.35874e-05
Polyphenols response surface		Conditions: 0.500g sample, 50% ethanol, liquid-solid ratio, temperature, water bath time, ultrasonic 12min, 6000r/min centrifugation 10min
	Polyphenols(762nm)
	test number	weight(g)	average weight(g)	0.5ml	0.5ml	average		extraction efficiency
	1	0.5008	0.50075	0.981	1.007	0.994	0.99475	0.0821268
		0.5007		0.993	0.998	0.9955
	2	0.5006	0.50065	1.005	1.04	1.0225	1.0255	0.084935
		0.5007		1.034	1.023	1.0285
	3	0.5004	0.5005	0.982	1.023	1.0025	1.00375	0.0829852
		0.5006		0.992	1.018	1.005
	4	0.5006	0.50055	1.146	1.162	1.154	1.1435	0.0956675
		0.5005		1.122	1.144	1.133
	5	0.5007	0.50065	1.009	1.013	1.011	1.01	0.0835278
		0.5006		0.99	1.028	1.009
	6	0.5008	0.5007	1.044	1.079	1.0615	1.05375	0.0874911
		0.5006		1.041	1.051	1.046
	7	0.5005	0.5004	1.082	1.109	1.0955	1.0905	0.0908818
		0.5003		1.085	1.086	1.0855
	8	0.5004	0.50045	1.007	0.998	1.0025	1.01325	0.0838563
		0.5005		1.021	1.027	1.024
	9	0.5006	0.5007	1.204	1.188	1.196	1.202	0.10095
		0.5008		1.198	1.218	1.208
	10	0.5008	0.50075	1.077	1.079	1.078	1.09	0.0907729
		0.5007		1.096	1.108	1.102
	11	0.5007	0.5007	1.025	1.012	1.0185	1.0305	0.0853805
		0.5007		1.044	1.041	1.0425
	12	0.5004	0.5004	1.016	1.035	1.0255	1.0195	0.0844325
		0.5004		1.001	1.026	1.0135
	13	0.5005	0.50055	0.966	0.972	0.969	0.96575	0.0795262
		0.5006		0.949	0.976	0.9625
	14	0.5007	0.50055	1.025	1.033	1.029	1.038	0.0860871
		0.5004		0.992	1.102	1.047
	15	0.5005	0.5006	1.09	1.127	1.1085	1.1065	0.0922983
		0.5007		1.103	1.106	1.1045
	The optimal conditions of polyphenols response surface optimization were as follows:
	Liquid-solid ratio (mL/g)	89.93mL/g
	extraction temperature	74.79℃
	time	1.53h
	ethanol concentration	0.5
	extraction efficiency	0.103

## Sheet: Flavonoids
Rutin content ug/mL	OD	OD	Average value
40	0.212	0.214	0.213
80	0.407	0.406	0.4065
120	0.564	0.565	0.5645
160	0.727	0.725	0.726
200	0.878	0.878	0.878
Flavonoids(508nm)
extraction temperature	weight(g)	average weight(g)	5.0ml	5.0ml	average		extraction efficiency	SD	extraction efficiency	SD
30℃	0.5005	0.5006	0.205	0.203	0.204	0.20625	0.0069843	0.00213307	0.00687605	0.00162334	Conditions: 0.500g sample, 50% ethanol, liquid-solid ratio of 60mL/g, temperature, water bath for 30min, ultrasound for 12min, centrifugation at 6000r/min for 10min
	0.5007		0.209	0.208	0.2085				0.00709251	0.00138533
40℃	0.5004	0.5005	0.23	0.242	0.236	0.2385	0.0085573	0.00542218	0.00843715	0.00118433
	0.5006		0.236	0.246	0.241				0.00867739	0.00314412
50℃	0.5005	0.5006	0.271	0.273	0.272	0.271025	0.0101403	0.00215441	0.0101898	0.00315368
	0.5007		0.2671	0.273	0.27005				0.0100908	0.00347449
60℃	0.5006	0.50065	0.259	0.262	0.2605	0.26175	0.00968741	0.00348569	0.00962747	0.00354324
	0.5007		0.268	0.258	0.263				0.00974733	0.00401762
70℃	0.5003	0.5005	0.303	0.307	0.305	0.306	0.0118467	0.00244949	0.0118027	0.00409198
	0.5007		0.31	0.304	0.307				0.0118907	0.00463984
Flavonoids(508nm)
extraction time	weight(g)	average weight(g)	5.0ml	5.0ml	average		extraction efficiency	SD	extraction efficiency	SD
0.5h	0.5006	0.5005	0.279	0.287	0.283	0.28225	0.0106893	0.00342783	0.0107237	1.72031e-05	Conditions: 0.500g sample, 50% ethanol, liquid-solid ratio of 60mL /g,50℃ water bath, water bath time as shown in the table, ultrasonic 12min, 6000r/min centrifugation for 10min
	0.5004		0.285	0.278	0.2815				0.0106549	1.721e-05
1.0h	0.5005	0.50055	0.302	0.299	0.3005	0.3035	0.0117237	0.003	0.0115787	7.2512e-05
	0.5006		0.305	0.308	0.3065				0.0118687	7.24976e-05
1.5h	0.5006	0.50065	0.322	0.342	0.332	0.30675	0.0118797	0.0236252	0.0131111	0.000615709
	0.5007		0.277	0.286	0.2815				0.0106485	0.000615586
2.0h	0.5005	0.5006	0.305	0.297	0.301	0.29775	0.0114424	0.00611146	0.011603	8.03322e-05
	0.5007		0.287	0.302	0.2945				0.0112818	8.03001e-05
2.5h	0.5006	0.50065	0.288	0.279	0.2835	0.28825	0.0109784	0.00636789	0.0107481	0.000115167
	0.5007		0.299	0.287	0.293				0.0112087	0.000115144
3.0h	0.5005	0.50065	0.285	0.276	0.2805	0.28425	0.0107835	0.0077039	0.010604	8.97561e-05
	0.5008		0.298	0.278	0.288				0.0109629	8.97024e-05
Flavonoids(508nm)
Liquid-solid ratio (mL/g)	weight(g)	average weight(g)	5.0ml	5.0ml	average		extraction efficiency	extraction efficiency	SD
10/1	0.5008	0.50075	0.157	0.17	0.1635	0.16125	0.00479038	0.00489948	5.45512e-05	Conditions: 0.500g sample, 50% ethanol, liquid-solid ratio as shown in the table,50℃ water bath for 30min, ultrasound for 12min, centrifugation at 6000r/min for 10min
	0.5007		0.161	0.157	0.159			0.00468125	5.45621e-05
20/1	0.5006	0.5006	0.192	0.195	0.1935	0.19075	0.00622911	0.0063631	6.69928e-05
	0.5006		0.184	0.192	0.188			0.00609512	6.69928e-05
30/1	0.5006	0.5005	0.218	0.223	0.2205	0.21475	0.00739992	0.00767859	0.000139337
	0.5004		0.214	0.204	0.209			0.00712113	0.000139392
40/1	0.5007	0.50075	0.218	0.242	0.23	0.21875	0.00759105	0.00813982	0.000274386
	0.5008		0.203	0.212	0.2075			0.00704239	0.000274331
50/1	0.5006	0.50065	0.237	0.237	0.237	0.23	0.00814064	0.0084825	0.000170934
	0.5007		0.226	0.22	0.223			0.00779884	0.000170899
60/1	0.5008	0.5007	0.234	0.243	0.2385	0.23225	0.00824943	0.00855217	0.000151372
	0.5006		0.227	0.225	0.226			0.00794656	0.000151432
70/1	0.5008	0.5008	0.244	0.171	0.2075	0.2235	0.00782163	0.00704239	0.000389621
	0.5008		0.233	0.246	0.2395			0.00860087	0.000389621
80/1	0.5007	0.5004	0.257	0.265	0.261	0.2555	0.00938761	0.0096499	0.000131146
	0.5001		0.252	0.248	0.25			0.009125	0.000131304
90/1	0.5007	0.50075	0.268	0.272	0.27	0.24325	0.00878438	0.0100883	0.000651965
	0.5008		0.217	0.216	0.2165			0.00748071	0.000651835
Flavonoids(508nm)
ethanol concentration	weight(g)	average weight(g)	5.0ml	5.0ml	average		extraction efficiency	extraction efficiency	SD
0.25	0.5009	0.5009	0.154	0.151	0.1525	0.1525	0.00436288	0.00436288	0	Conditions: 0.500g sample, solvent concentration as shown in the table, liquid-solid ratio of 60mL /g,50℃ water bath for 30min, ultrasound for 12min, centrifugation at 6000r/min for 10min
	0.5009		0.156	0.149	0.1525			0.00436288	0
0.5	0.5007	0.5008	0.204	0.202	0.203	0.20225	0.0067867	0.00682459	1.89448e-05
	0.5009		0.202	0.201	0.2015			0.00674883	1.89373e-05
0.6	0.5007	0.5006	0.219	0.215	0.217	0.215	0.00741062	0.00750656	4.79723e-05
	0.5005		0.215	0.211	0.213			0.00731464	4.79914e-05
0.75	0.5001	0.5002	0.227	0.216	0.2215	0.222	0.00775787	0.00773504	1.14171e-05
	0.5003		0.23	0.215	0.2225			0.0077807	1.14125e-05
1	0.5003	0.5004	0.366	0.374	0.37	0.3725	0.0150904	0.0149715	5.94309e-05
	0.5005		0.379	0.371	0.375			0.0152092	5.94072e-05
Flavonoids(508nm)								Conditions: 0.500g sample, 100% ethanol, liquid-solid ratio, temperature, water bath time, ultrasonic 12min, 6000r/min centrifugation 10min
test number	weight(g)	average weight(g)	5ml	5ml	average		extraction efficiency	SD
1	0.5001	0.50015	0.239	0.246	0.2425	0.25875	0.00955079	0.1035
	0.5002		0.276	0.274	0.275
2	0.5000	0.5	0.246	0.255	0.2505	0.2635	0.00978537	0.134175
	0.5000		0.254	0.299	0.2765
3	0.5000	0.50015	0.254	0.26	0.257	0.26475	0.00984339	0.0093675
	0.5003		0.263	0.282	0.2725
4	0.5002	0.50025	0.257	0.263	0.26	0.25225	0.00923197	0.00735867
	0.5003		0.247	0.242	0.2445
5	0.5000	0.5001	0.254	0.241	0.2475	0.2445	0.00885677	0.00491935
	0.5002		0.242	0.241	0.2415
6	0.5006	0.50065	0.261	0.269	0.265	0.2765	0.010406	0.0110544
	0.5007		0.283	0.293	0.288
7	0.5004	0.50055	0.278	0.281	0.2795	0.27425	0.0102984	0.00515267
	0.5007		0.266	0.272	0.269
8	0.5003	0.50045	0.268	0.264	0.266	0.26575	0.00988622	0.0025593
	0.5006		0.269	0.262	0.2655
9	0.5005	0.5007	0.288	0.288	0.288	0.2875	0.0109408	0.00194936
	0.5009		0.284	0.29	0.287
10	0.5004	0.5004	0.298	0.318	0.308	0.30475	0.0117881	0.00702496
	0.5004		0.303	0.3	0.3015
11	0.5001	0.50025	0.269	0.271	0.27	0.2675	0.0099755	0.00240832
	0.5004		0.264	0.266	0.265
12	0.5006	0.5007	0.295	0.294	0.2945	0.28875	0.0110017	0.00639922
	0.5008		0.289	0.277	0.283
13	0.5008	0.5007	0.327	0.333	0.33	0.316	0.0123291	0.0141563
	0.5006		0.312	0.292	0.302
14	0.5006	0.5005	0.289	0.303	0.296	0.2875	0.0109452	0.0101489
	0.5004		0.271	0.287	0.279
15	0.5006	0.50065	0.268	0.266	0.267	0.2655	0.0098701	0.00649615
	0.5007		0.274	0.254	0.264
The optimal conditions of flavonoids response surface optimization were as follows:
Liquid-solid ratio (mL/g)	70.69mL/g
extraction temperature	73.99℃
time	1.01h
ethanol concentration	1
extraction efficiency	0.0129
